# Supplementary material
Source: publisher figshare collection journal article supplement (https://acs.figshare.com/ndownloader/files/17798999)
Supplement: Supplementary file 1 [file 17798999]

Supporting Information for

## **Effect of Wavelength-Scale Cu<sub>2</sub>O Particles on the Performance of Photocathodes for Solar Water Splitting**

*Jin-Hyun Choi<sup>1</sup>, Jehyeok Ryu<sup>1</sup>, Hoang Minh Nguyen<sup>2</sup>, Jihoon Choi<sup>3</sup>, Heeso Noh<sup>3</sup>, Seongpil Hwang<sup>2\*</sup>, and Jae-Won Jang<sup>1\*</sup>*

<sup>1</sup>Department of Physics, Pukyong National University, Busan 48513, Republic of Korea

<sup>2</sup>Department of Advanced Materials Chemistry, Korea University, Sejong 30019, Republic of Korea

<sup>3</sup>Department of Nano and Electronic Physics, Kookmin University, Seoul, 02707, Republic of Korea

## I. Particle size characterization by AFM and XRD measurements

To characterize the particle sizes of the Cu<sub>2</sub>O structures, atomic force microscopy (AFM) measurements were carried out. In Figure S1 (a-c), AFM topographic images of the Cu<sub>2</sub>O film and Cu<sub>2</sub>O patterned structure are displayed. Through grain size analysis in the AFM image processing software (Gwyddion 2.50, Czech Metrology Institute, Czech Republic), the particle sizes of the Cu<sub>2</sub>O patterned structure (~ 395 nm and ~ 90 nm) show smaller diameters than those of the Cu<sub>2</sub>O film (~ 1260 nm), as shown in Figure S1(d). In addition, the particles at the bottom of the Cu<sub>2</sub>O patterned structure (~ 90 nm) are much smaller than those at the top of the Cu<sub>2</sub>O patterned structure, which matches the expectation that the growth of the Cu<sub>2</sub>O particles is restricted by the reaction space (mold size). The Cu<sub>2</sub>O film is obtained without the use of a mold, where Cu freely reacts with the NaOH solution, such that the Cu<sub>2</sub>O particles can fully grow (~ 1260 nm). On the other hand, the Cu<sub>2</sub>O patterned structure is fabricated with the mold (growth restriction), where the growth of the Cu<sub>2</sub>O particles is restricted; hence, the Cu<sub>2</sub>O particles cannot fully grow (~ 395 nm). Because the contact region between the Cu layer and the PDMS stamp (the mold) has very limited space between the two surfaces, the growth of the Cu<sub>2</sub>O particles is much more restricted such that relatively smaller particles (~ 90 nm) are obtained. The grain sizes (crystalline domains) of the Cu<sub>2</sub>O structures can be obtained from the characteristic Cu<sub>2</sub>O peaks in the X-ray diffraction (XRD) patterns (Figure S2(a-d)) using the Scherrer equation. By means of the Scherrer equation<sup>1</sup>, the grain size ( $\tau$ ) can be calculated as:

$$\tau = \frac{K\lambda}{\beta \cos\theta} \quad (1),$$

where  $K$  is a dimensionless shape factor of 0.9, generally<sup>1</sup>,  $\lambda$  is the X-ray wavelength (1.54 Å),  $\beta$  is the full width at half maximum (FWHM) of each characteristic peak, and  $\theta$  is the Bragg angle. In Table S1, the grain sizes of the Cu<sub>2</sub>O film and patterned structure are displayed, which were calculated from the Cu<sub>2</sub>O characteristic peaks in Figure S2(a-d). Similar to the particle sizes (Figure S1), the grain sizes of the Cu<sub>2</sub>O patterned structure are smaller than that of the Cu<sub>2</sub>O film.

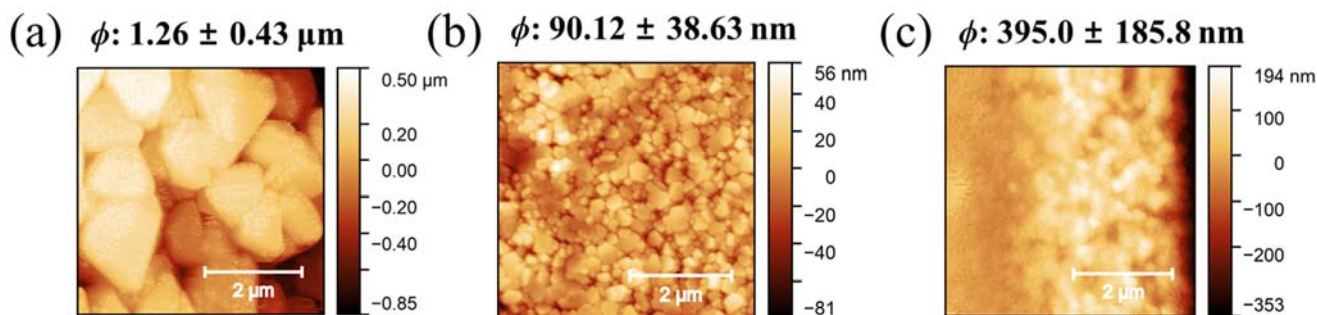

**Figure S1** Topological AFM images measured for (a) the Cu<sub>2</sub>O film and the (b) bottom and (c) top of the Cu<sub>2</sub>O patterned structure. The particle size ( $\phi$ ) as analyzed from the AFM images is denoted.

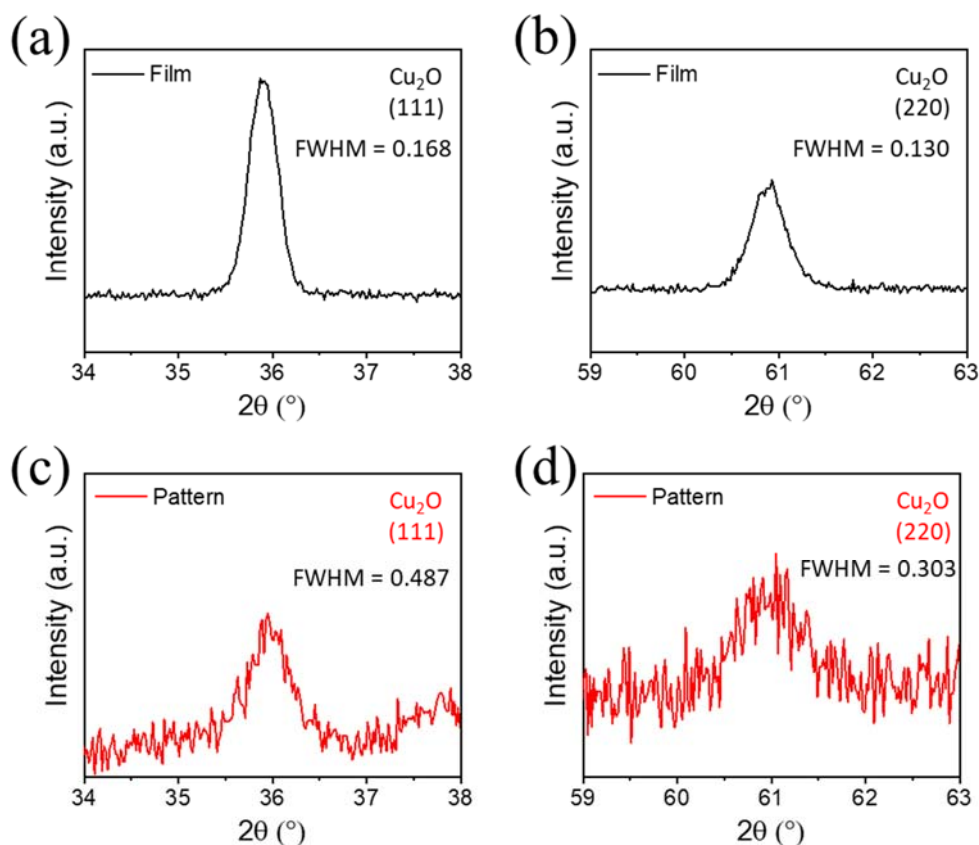

**Figure S2** Cu<sub>2</sub>O characteristic peaks in the XRD patterns of (a, b) the Cu<sub>2</sub>O film and (c, d) the Cu<sub>2</sub>O patterned structure. The (a, c) Cu<sub>2</sub>O (111) and (b, d) (220) peaks of the film and patterned structure are displayed with their full width at half maximum (FWHM) values.

| <b>Grain size of Cu<sub>2</sub>O</b> |             |                |
|--------------------------------------|-------------|----------------|
| <b>Crystalline</b>                   | <b>Film</b> | <b>Pattern</b> |
| <b>(111)</b>                         | 18.05 nm    | 6.25 nm        |
| <b>(220)</b>                         | 25.84 nm    | 11.09 nm       |

**Table S1** Grain sizes of the Cu<sub>2</sub>O structures obtained from Figure S2 using the Scherrer equation.

## II. Cross-sectional SEM measurements of the Cu<sub>2</sub>O structures

To compare the thicknesses of the Cu<sub>2</sub>O film and patterned structure, cross-sectional SEM images were measured as shown in Figure S3. The thicknesses of the Cu<sub>2</sub>O structures can be determined as the distance from the substrate to the top of the Cu<sub>2</sub>O structures (denoted as the red arrows in Figure S3). The thickness of the Cu<sub>2</sub>O film is approximately 2.6 μm (Figure S3(a)) and that of the Cu<sub>2</sub>O patterned structure is approximately 1.3 μm (Figure S3(b)). The different thickness of the Cu<sub>2</sub>O film and Cu<sub>2</sub>O patterned structure can be explained by Pilling-Bedworth Ratio (PBR). In typical metal oxidation procedure, volume expansion of the metal oxide, compared to the metal volume before the oxidation, is a well-known phenomenon.<sup>2-3</sup> PBR represents the volume change due to oxide formation at the metal and oxide interface. And PBR value of Cu and Cu<sub>2</sub>O interface is known about 1.67 (that is the Cu layer can be expanded over 167%).<sup>2</sup> The expended volume ratio of the Cu<sub>2</sub>O film and Cu<sub>2</sub>O patterned structure can be roughly calculated with the thickness of the final structures, which are 2 – 2.6 (the Cu<sub>2</sub>O film) and 1.3 – 1.6 (the Cu<sub>2</sub>O pattern), respectively. Figure S3 shows that the fabricated Cu<sub>2</sub>O film is not fully filled by the Cu<sub>2</sub>O grains while the Cu<sub>2</sub>O patterned structure shows the more relatively filled (less empty spaces) structure by the grains. Thus, we assume that the bigger expended volume ratio of the Cu<sub>2</sub>O film (2 – 2.6) than the PBR value of Cu and Cu<sub>2</sub>O interface (1.67) is reasonable with influences of the empty spaces in the Cu<sub>2</sub>O film. Also, the slightly smaller expended volume ratio of the Cu<sub>2</sub>O pattern (1.3 – 1.6) than the PBR value of Cu and Cu<sub>2</sub>O interface (1.67) can be understood that by the partial transformation of the Cu to Cu<sub>2</sub>O happens in the Cu<sub>2</sub>O patterned structure.

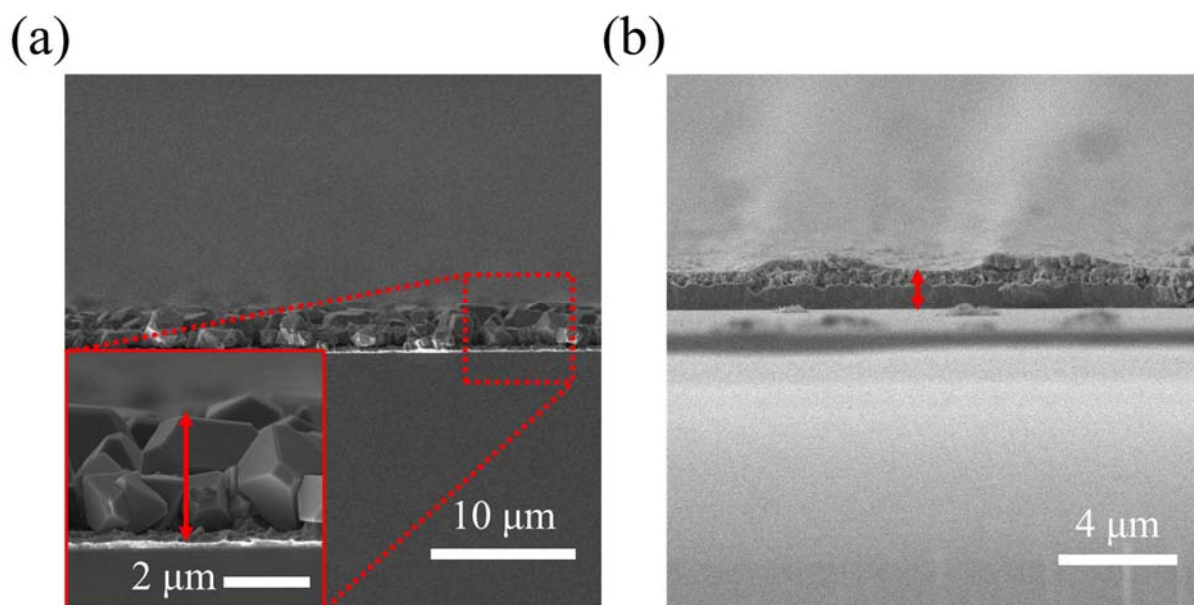

**Figure S3** Cross-sectional SEM images of the Cu<sub>2</sub>O (a) film and (b) patterned structure. The red double-headed arrows indicate the thicknesses of the structure

### III. Detailed setup for the FDTD simulations of the Cu<sub>2</sub>O structures

A detailed setup for the FDTD simulations of the Cu<sub>2</sub>O structures is shown in Figure S4. A prospective view with labels (the red numbers) for all the components of the FDTD simulations are displayed in Figure S4(a). The FDTD simulations are carried out in a space of 8  $\mu\text{m}$  (x)  $\times$  10  $\mu\text{m}$  (y)  $\times$  8  $\mu\text{m}$  (z) (displayed as the orange box (“2”). Periodic boundary conditions (in the x- and z-axes) and perfectly matched layers (PML) (in the y-axis) are used for the FDTD simulations. The plane wave (400 – 900 nm) source is placed 8  $\mu\text{m}$  above (on the y-axis) the bottom of the 50 nm thick Au layer on the glass substrate (“5”). The plane wave proceeds in a direction normal to the Cu<sub>2</sub>O structure (“7”). The Cu<sub>2</sub>O structure is filled with randomly generated Cu<sub>2</sub>O particles. The dimensions of the Cu<sub>2</sub>O particles are set to the empirically observed Cu<sub>2</sub>O particle sizes ( $\phi_{\text{large}}$ : ~1260 nm,  $\phi_{\text{small}}$ : ~395 nm, Figure S1). The reflection monitor (“3”) and transmission monitor (“4”) are placed 9  $\mu\text{m}$  above and 1  $\mu\text{m}$  below (in the y-axis) the substrate, respectively. Component “6” is a cross-sectional E-field monitor, which is also used as a time-dependent movie monitor. The override mesh region (“8”) is composed of a 10 nm mesh. A cross-sectional view of the Cu<sub>2</sub>O structure on the 50 nm thick Au layer on the glass substrate is displayed in Figure S2(b, c). Figure S2(b) and S2(c) correspond to the Cu<sub>2</sub>O film and patterned structure, respectively, where the dimensions of the Cu<sub>2</sub>O structures are equivalently matched to the empirically measured dimensions of the Cu<sub>2</sub>O film and patterned structure (Figure 2).

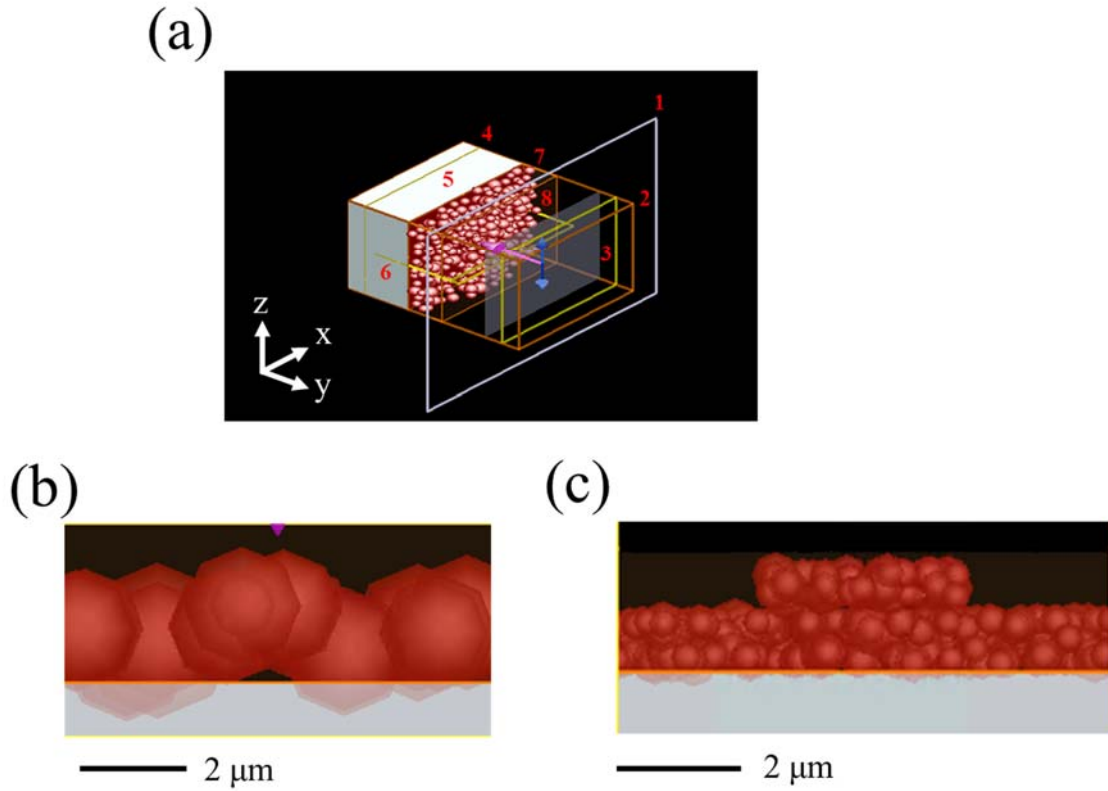

**Figure S4** (a) A perspective view of the model used for the FDTD simulations of the Cu<sub>2</sub>O samples with x-, y-, z-coordinates. The red-colored numbers are labels for the components (monitors, source, regions, sample object, and region of the override mesh). Cross-sectional view of the Cu<sub>2</sub>O (b) film and (c) patterned structure used in the FDTD simulations.



#### IV. Time-dependent E-field profiles of the Cu<sub>2</sub>O structures

Cross-sectional time-dependent E-field profiles were measured as shown in Movie S1. The time at which the incident broadband light source appeared at the top of the monitor is set as the reference time ( $t = 0$  fs). For comparison, E-field profiles with and without the 50-nm-thick Au substrate are measured. In the case of the Cu<sub>2</sub>O patterned structure ( $\phi_{\text{small}}$ :  $\sim 395$  nm), the E-field lasts longer than that in the Cu<sub>2</sub>O film ( $\phi_{\text{large}}$ :  $\sim 1260$  nm). In addition, the E-field lasts longer in the Cu<sub>2</sub>O patterned structure with the mirror substrate (50 nm thick Au substrate) than without the mirror substrate. In detail, the lifetimes of the E-field follow the order of the Cu<sub>2</sub>O film without the Au substrate (129 fs), the Cu<sub>2</sub>O film with the Au substrate (130 fs), the Cu<sub>2</sub>O patterned structure without the Au substrate (155 fs), and the Cu<sub>2</sub>O patterned structure with the Au substrate (170 fs).

**Movie S1** Time-dependent cross-sectional E-field profiles of the Cu<sub>2</sub>O film and patterned structure with and without the Au substrate.

## V. Thickness dependent absorption of the Cu<sub>2</sub>O patterned structure

Finite-difference time-domain (FDTD) simulation is carried out to characterize absorption of equivalently thick Cu<sub>2</sub>O film and the Cu<sub>2</sub>O patterned structure. Figure S5 shows absorbance spectra of the Cu<sub>2</sub>O film (the black line, 2.6  $\mu\text{m}$  thickness), the Cu<sub>2</sub>O patterned structure (the red line, 1.3 - 1.6  $\mu\text{m}$  thickness), and the Cu<sub>2</sub>O patterned structure of equivalent thickness with the Cu<sub>2</sub>O film (the blue line, 2.3 - 2.6  $\mu\text{m}$  thickness) obtained from the FDTD simulations. In Figure S5, the Cu<sub>2</sub>O patterned structure of equivalent thickness (the blue box) shows a slightly increasing absorption spectrum than the Cu<sub>2</sub>O patterned structure (the red box) without noticeable change of the spectrum. Thus, we conclude that the Cu<sub>2</sub>O particle size effect still makes an important role in the absorption of the Cu<sub>2</sub>O patterned structure of equivalent thickness. In addition, the slightly increasing absorption of the Cu<sub>2</sub>O patterned structure of equivalent thickness (2.3 - 2.6  $\mu\text{m}$  thickness) would result from increasing volume than the Cu<sub>2</sub>O patterned structure (1.3 - 1.6  $\mu\text{m}$  thickness), which seems to less influence than the Cu<sub>2</sub>O particle size on the absorption.

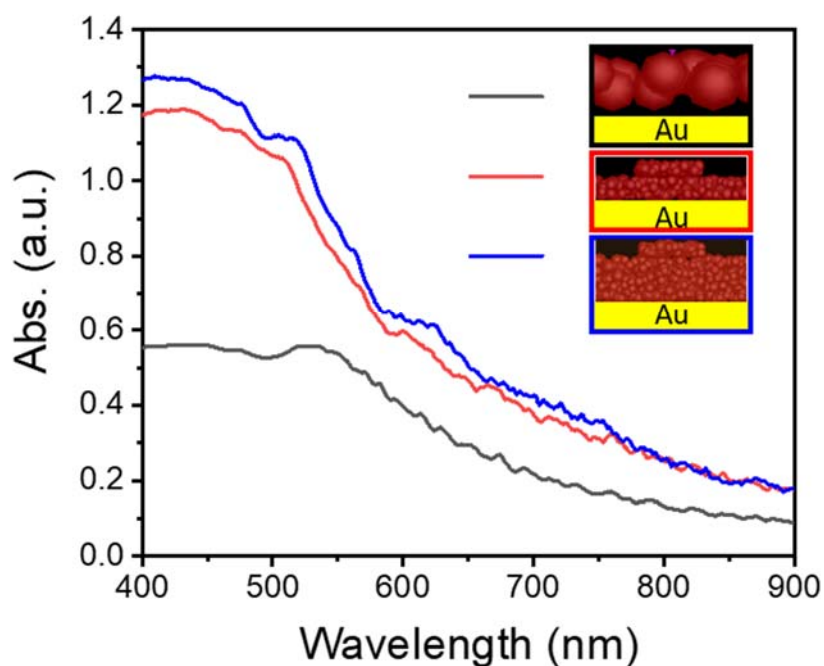

**Figure S5.** Absorbance spectra of the Cu<sub>2</sub>O film (the black box), the Cu<sub>2</sub>O patterned structure (the red box), and the Cu<sub>2</sub>O patterned structure of equivalent thickness with the Cu<sub>2</sub>O film (the blue box) obtained from the FDTD simulations.

## VI. Photoluminescence spectra and time-resolved photoluminescence parameters of the Cu<sub>2</sub>O photocathodes

Photoluminescence (PL) spectra of the Cu<sub>2</sub>O photocathodes are presented in Figure S6. Y1 exciton peak ( $\sim 635$  nm) of the Cu<sub>2</sub>O<sup>4-5</sup> is observed both in the Cu<sub>2</sub>O film and pattern photocathodes. The PL decay curves, which are presented in Figure 5(c) and 5(d) in the manuscript, are fitted with Eq. (3) in the manuscript. Parameters obtained from the fitting are presented in Table S2.

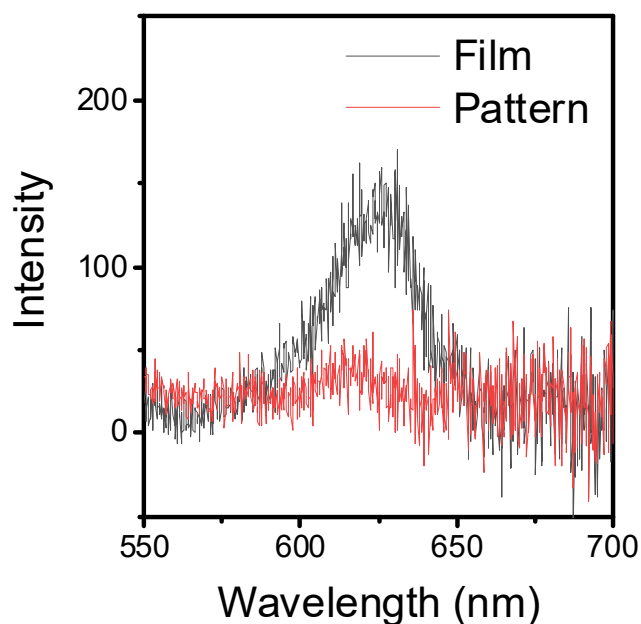

**Figure S6.** PL spectra of the Cu<sub>2</sub>O film and the Cu<sub>2</sub>O pattern photocathodes.

|         | $A_1$  | $\tau_1$ (ns)     | $A_2$ | $\tau_2$ (ns)     |
|---------|--------|-------------------|-------|-------------------|
| Film    | 3924.7 | $0.226 \pm 0.002$ | 433.1 | $0.709 \pm 0.027$ |
| Pattern | 186.0  | $0.167 \pm 0.001$ | 35.9  | $0.538 \pm 0.064$ |

**Table S2.** Parameters of the PL decay of the Cu<sub>2</sub>O photocathodes fitting with Eq. (3) in the manuscript.

## VII. Cu<sub>2</sub>O patterned structure fabricated by Au nanomembrane-based lithography

According to our previous report on Au nanomembrane-based lithography<sup>6</sup>, a thin Au film (nanomembrane) on top of the reacting metal layer (in our case, the Cu layer) is beneficial for the fabrication of a more uniform molded structure. Hence, a Cu<sub>2</sub>O patterned structure was also fabricated using Au nanomembrane-based lithography. The fabrication method for Au nanomembrane-based lithography is the same as the method shown in Figure 1, except for the deposition of a Au nanomembrane (20 nm) on the Cu/Au/Ti (1000/50/10 nm) film on the glass substrate. The AFM measurements of the Cu<sub>2</sub>O patterned structure fabricated using Au nanomembrane-based lithography are shown in Figure S5(a, b). The fabricated Cu<sub>2</sub>O structure has a more distinct patterned structure (but the height of the pattern is smaller) than the Cu<sub>2</sub>O patterned structure shown in Figure 2 and Figure S1(b, c). The magnified image in Figure S5(a) was used for particle size analysis. The particle size of the Cu<sub>2</sub>O patterned structure fabricated using Au nanomembrane-based lithography is  $63 \pm 19$  nm (measured at the top of the pattern), which is smaller than the top of the Cu<sub>2</sub>O patterned structure prepared without lithography (particle size:  $\sim 395$  nm), as shown in Figures 2 and S1. The height of the Cu<sub>2</sub>O patterned structure fabricated using Au nanomembrane-based lithography is approximately 40 nm, as shown in Figure S5(b).

In addition, the photocatalytic activity of the Cu<sub>2</sub>O patterned structure fabricated using Au nanomembrane-based lithography is characterized by photoelectrochemistry (PEC) measurements with the light on and off. As shown in Figure S5(c), no distinct photocurrent density can be observed. We assume that the Cu<sub>2</sub>O structure is too thin to work as a light absorber and does not necessarily work during the PEC process, where the lower Au nanomembrane can directly react with the ions in the solution.

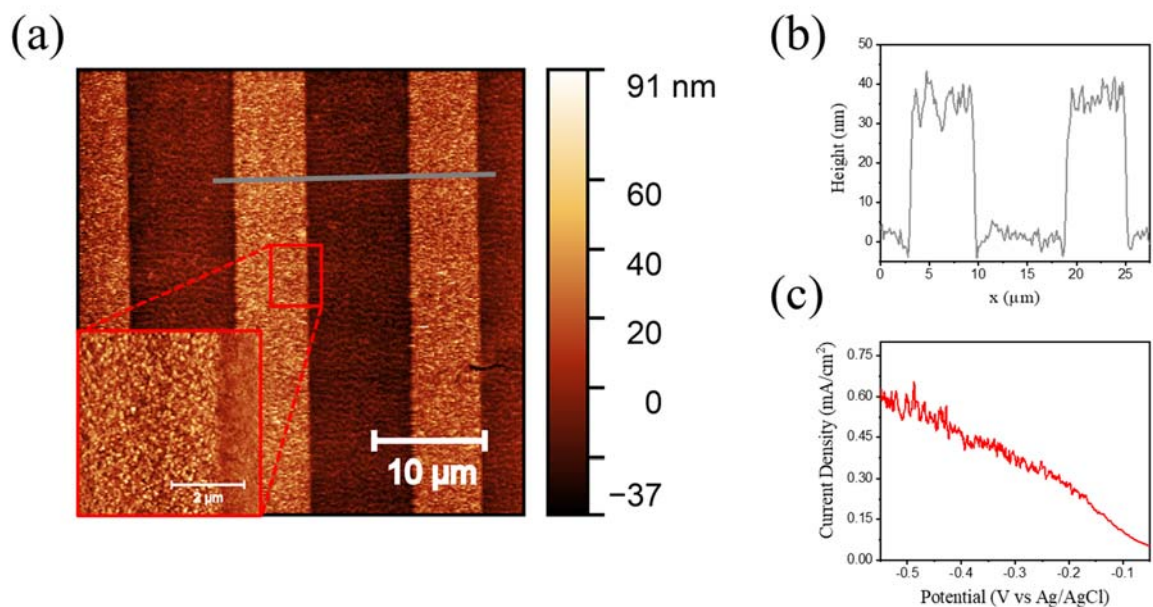

**Figure S7** (a) A topological AFM image of a  $\text{Cu}_2\text{O}$  patterned structure fabricated using Au nanomembrane-based lithography. The inset is a magnified image of the region observed in the red box. (b) A cross-sectional line profile (obtained from the dark gray line in (a)). (c) Potential-dependent current density curve of the  $\text{Cu}_2\text{O}$  patterned structure fabricated using Au nanomembrane-based lithography obtained from the PEC measurements.

## VIII. Photostability of the Cu<sub>2</sub>O photocathodes

To test the photostability of the Cu<sub>2</sub>O photocathodes, we measured time-dependent photocurrent density of the Cu<sub>2</sub>O film and the Cu<sub>2</sub>O pattern photocathodes (PEC measurement at -0.4 V vs. Ag/AgCl). Figure S8 are the same data as the inset of Figure 5(b) in the manuscript. Figure S8 is differently displayed in min- and sec-scales to emphasize the saturated time of photocurrent densities. Figure S8(a) and S8(b) show that photocurrent density of the Cu<sub>2</sub>O patterned structure becomes stable (~ 50 sec, the red-line in Figure S8(a)) faster than the Cu<sub>2</sub>O film (~ 50 min, the black-line in Figure S8(b)). The faster time of the Cu<sub>2</sub>O patterned structure to be photostable would be related to the better durability of the Cu<sub>2</sub>O patterned structure than that of the Cu<sub>2</sub>O film. (mentioned in the manuscript with the lower onset potential of the Cu<sub>2</sub>O patterned structure).

In addition, to verify the reproducibility of the Cu<sub>2</sub>O photocathodes, reproducible PEC activity of the Cu<sub>2</sub>O photocathodes for different LSV scans was evaluated with dark and light irradiated current densities measured before and after the photostability test of the Cu<sub>2</sub>O photocathodes (the hour-scale time-dependent photocurrent densities ( $J_{Ph-t}$ ) shown in Figure S8(a)). Figure S8(a) shows the dark and light irradiated current densities LSV measurements of the Cu<sub>2</sub>O film photocathode; the solid lines (same data shown in Figure S8(a)) and the dotted lines represent the data obtained before and after the 5 hours continuing photostability test, respectively. The current densities measured after the photostability test somehow decrease, and on-set potential of anodic photocurrent (the crossover potential of the dark and light irradiated current densities) negatively increases (from ~ -1V to ~ -0.15 V). On the other hands, the dark and light irradiated current densities LSV measurements of the Cu<sub>2</sub>O pattern photocathode are displayed in Figure S8(b); the solid lines (same data shown in Figure S8(b)) and the dotted lines represent the data obtained before and after the 10 hours continuing photostability test, respectively. It turns out that both Cu<sub>2</sub>O film and pattern photocathodes are degraded after long exposure of the light irradiation, but the on-set potentials of the anodic photocurrent in the Cu<sub>2</sub>O film are expected to be more negative (See the crossover points of the dark and light irradiated current densities), which was reproducibly observed in Figure 5(b) of the manuscript. To further investigation, we obtain photocurrent densities of the Cu<sub>2</sub>O photocathodes from Figure S8 (a) and (b) (by subtracting the dark current densities to the light irradiated current densities) and display in Figure S8 (c) and (d). Despite photo-degradations, the photocurrent densities of the Cu<sub>2</sub>O pattern photocathode are still higher than the Cu<sub>2</sub>O film photocathode. Therefore, it can be concluded that the PEC activity of the Cu<sub>2</sub>O photocathodes is reproducible

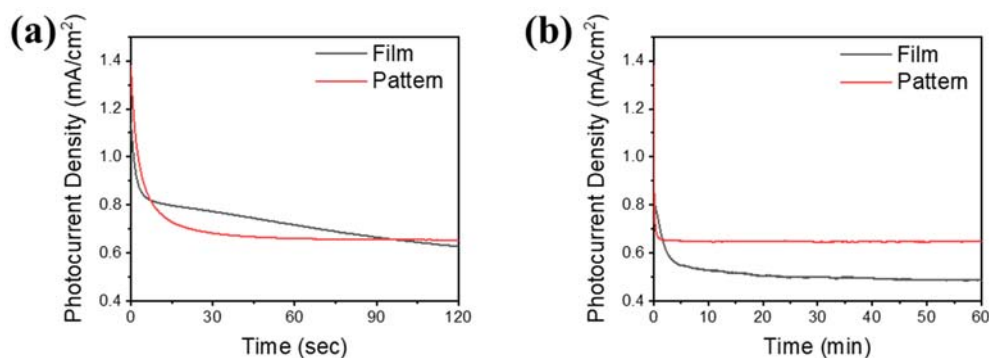

**Figure S8.** Time-dependent photocurrent density of the Cu<sub>2</sub>O film and the Cu<sub>2</sub>O pattern photocathodes in (a) sec- and (b) min-scales. The photocurrent densities are measured with PEC set-up (at -0.4 V vs. Ag/AgCl with 1.5 AM halogen lamp).

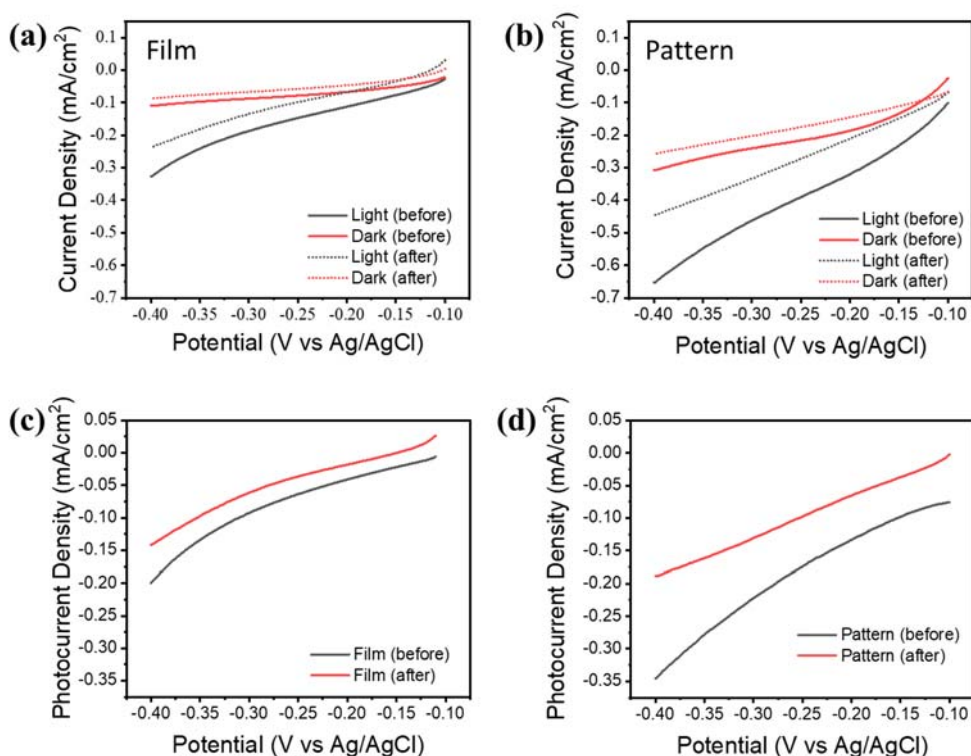

**Figure S9.** (a) Dark and light irradiated current densities LSV measurements of the Cu<sub>2</sub>O film photocathode, obtained before (the solid lines) and after (the dotted lines) 5 hours continuing time-dependent photocurrent density ( $J_{Ph-t}$ ) measurements. (b) Dark and light irradiated current densities LSV measurements of the Cu<sub>2</sub>O pattern photocathode, obtained before (the solid lines) and after (the dotted lines) 10 hours continuing  $J_{Ph-t}$  measurements. (c,d) The photocurrent densities of the Cu<sub>2</sub>O photocathodes obtained from before (the black lines) and after (the red lines) the  $J_{Ph-t}$  measurements. (c) and (d) are obtained from (a) and (b), respectively.

## References

- <sup>1</sup> Monshi, A.; Foroughi, M. R.; Monshi, M. R. Modified Scherrer Equation to Estimate More Accurately Nano-Crystallite Size Using XRD. *World J. Nano Sci. Eng.* **2012**, *2*, 7.
- <sup>2</sup> German, R. M.; Munir, Z. A. A Correlation between the Pilling-Bedworth Ratio and the Radius of Curvature of Metallic Substrates with Coherent Thin Oxide Layers. *Oxid. Met.* **1974**, *8*, 123-129.
- <sup>3</sup> Xu, C.; Gao, W. Pilling-Bedworth Ratio for Oxidation of Alloys. *Mater. Res. Innov.* **2000**, *3*, 231-235.
- <sup>4</sup> Wang, P.; Zhao, X.; Li, H.; Li, L.; Li, J.; Ma, G.; Chang, J. Temperature Sensitive Optical Properties of Exciton and Room-Temperature Visible Light Emission from Disordered Cu<sub>2</sub>O Nanowires. *RSC Adv.* **2014**, *4*, 37542-37546.
- <sup>5</sup> Hossain, M. A.; Al-Gaashani, R.; Hamoudi, H.; Al Marri, M. J.; Hussein, I. A.; Belaidi, A.; Merzougui, B. A.; Alharbi, F. H.; Tabet, N. Controlled Growth of Cu<sub>2</sub>O Thin Films by Electrodeposition Approach. *Mat. Sci. Semicon. Proc.* **2017**, *63*, 203-211.
- <sup>6</sup> Oh, C.-M.; Park, K. H.; Choi, J.-H.; Hwang, S.; Noh, H.; Yu, Y. M.; Jang, J.-W. Polycrystalline Au Nanomembrane as a Tool for Two-Tone Micro/Nanolithography. *Chem. Mater.* **2017**, *29*, 3863-3872.
